# Supplementary material
Source: publisher figshare collection journal article supplement (https://acs.figshare.com/ndownloader/files/4280262)
Supplement: Supplementary file 1 [file 4280262]

 
data_10082 
 
_audit_creation_method            SHELXL-97 
_chemical_name_systematic 
; 
 ? 
; 
_chemical_name_common             ? 
_chemical_melting_point           ? 
_chemical_formula_moiety          'C41 H66 N2 P2 Ti, 0.5 C4 H10 O' 
_chemical_formula_sum 
 'C43 H71 N2 O0.50 P2 Ti' 
_chemical_formula_weight          733.86 
 
loop_ 
 _atom_type_symbol 
 _atom_type_description 
 _atom_type_scat_dispersion_real 
 _atom_type_scat_dispersion_imag 
 _atom_type_scat_source 
 'C'  'C'   0.0033   0.0016 
 'International Tables Vol C Tables 4.2.6.8 and 6.1.1.4' 
 'H'  'H'   0.0000   0.0000 
 'International Tables Vol C Tables 4.2.6.8 and 6.1.1.4' 
 'N'  'N'   0.0061   0.0033 
 'International Tables Vol C Tables 4.2.6.8 and 6.1.1.4' 
 'O'  'O'   0.0106   0.0060 
 'International Tables Vol C Tables 4.2.6.8 and 6.1.1.4' 
 'P'  'P'   0.1023   0.0942 
 'International Tables Vol C Tables 4.2.6.8 and 6.1.1.4' 
 'Ti'  'Ti'   0.2776   0.4457 
 'International Tables Vol C Tables 4.2.6.8 and 6.1.1.4' 
 
_symmetry_cell_setting            monoclinic 
_symmetry_space_group_name_H-M    P2(1)/n
_symmetry_space_group_name_Hall   '-P 2ybc'
 
loop_ 
 _symmetry_equiv_pos_as_xyz 
 'x, y, z' 
 '-x+1/2, y+1/2, -z+1/2' 
 '-x, -y, -z' 
 'x-1/2, -y-1/2, z-1/2' 
 
_cell_length_a                    14.204(2) 
_cell_length_b                    12.406(2) 
_cell_length_c                    25.237(5) 
_cell_angle_alpha                 90.00 
_cell_angle_beta                  101.599(3) 
_cell_angle_gamma                 90.00 
_cell_volume                      4356.4(13) 
_cell_formula_units_Z             4 
_cell_measurement_temperature     150(2) 
_cell_measurement_reflns_used    1728
_cell_measurement_theta_min        3.64
_cell_measurement_theta_max       20.52 
 
_exptl_crystal_description        plate 
_exptl_crystal_colour             orange
_exptl_crystal_size_max           0.13 
_exptl_crystal_size_mid           0.11 
_exptl_crystal_size_min           0.02 
_exptl_crystal_density_meas       ? 
_exptl_crystal_density_diffrn     1.119 
_exptl_crystal_density_method     'not measured' 
_exptl_crystal_F_000              1596 
_exptl_absorpt_coefficient_mu     0.301 
_exptl_absorpt_correction_type    multi-scan 
_exptl_absorpt_correction_T_min   0.9620 
_exptl_absorpt_correction_T_max   0.9940 
_exptl_absorpt_process_details    'SADABS, R. Blessing; 1995' 
 
_exptl_special_details 
; 
 ? 
; 
 
_diffrn_ambient_temperature       150(2) 
_diffrn_radiation_wavelength      0.71073 
_diffrn_radiation_type            MoK\a 
_diffrn_radiation_source          'fine-focus sealed tube' 
_diffrn_radiation_monochromator   graphite 
_diffrn_measurement_details  
 '0.30 degree frames measured for 150 seconds each' 
_diffrn_measurement_method        'omega and phi scans' 
_diffrn_measurement_device        'APEX Kappa Duo' 
_diffrn_measurement_device_type   'Kappa' 
_diffrn_detector                  'CCD area detector' 
_diffrn_detector_type             'Bruker APEXII'
_diffrn_detector_area_resol_mean  83.33 
_diffrn_reflns_number             30051 
_diffrn_reflns_av_R_equivalents   0.1494 
_diffrn_reflns_av_sigmaI/netI     0.1369 
_diffrn_reflns_limit_h_min        -17 
_diffrn_reflns_limit_h_max        13 
_diffrn_reflns_limit_k_min        -14 
_diffrn_reflns_limit_k_max        15 
_diffrn_reflns_limit_l_min        -30 
_diffrn_reflns_limit_l_max        30 
_diffrn_reflns_theta_min          3.64 
_diffrn_reflns_theta_max          25.71 
_reflns_number_total              8249 
_reflns_number_gt                 4551 
_reflns_threshold_expression      >2sigma(I) 
 
_computing_data_collection        'APEX II v2009.5.0 (Bruker, 2009)' 
_computing_cell_refinement        'APEX II v2009.5.0 (Bruker, 2009)'
_computing_data_reduction         'APEX II v2009.5.0 (Bruker, 2009)' 
_computing_structure_solution     'SIR-2004 (Burla et al., 2005)' 
_computing_structure_refinement   'SHELXL-97 (Sheldrick, 2008)' 
_computing_molecular_graphics     'SHELXTL (Bruker, 2008)' 
_computing_publication_material   'SHELXTL (Bruker, 2008)'
 
_refine_special_details 
; 
 Refinement of F^2^ against ALL reflections.  The weighted R-factor wR and 
 goodness of fit S are based on F^2^, conventional R-factors R are based 
 on F, with F set to zero for negative F^2^. The threshold expression of 
 F^2^ > 2sigma(F^2^) is used only for calculating R-factors(gt) etc. and is 
 not relevant to the choice of reflections for refinement.  R-factors based 
 on F^2^ are statistically about twice as large as those based on F, and R- 
 factors based on ALL data will be even larger. 
; 
 
_refine_ls_structure_factor_coef  Fsqd  
_refine_ls_matrix_type            full 
_refine_ls_weighting_scheme       calc  
_refine_ls_weighting_details 
 'calc w=1/[\s^2^(Fo^2^)+(0.0478P)^2^+1.8093P] where P=(Fo^2^+2Fc^2^)/3' 
_atom_sites_solution_primary      direct 
_atom_sites_solution_secondary    difmap 
_atom_sites_solution_hydrogens    geom 
_refine_ls_hydrogen_treatment     constr 
_refine_ls_extinction_method      none 
_refine_ls_extinction_coef        ? 
_refine_ls_number_reflns          8249 
_refine_ls_number_parameters      449 
_refine_ls_number_restraints      4 
_refine_ls_R_factor_all           0.1435 
_refine_ls_R_factor_gt            0.0635 
_refine_ls_wR_factor_ref          0.1458 
_refine_ls_wR_factor_gt           0.1192 
_refine_ls_goodness_of_fit_ref    1.006 
_refine_ls_restrained_S_all       1.006 
_refine_ls_shift/su_max           0.001 
_refine_ls_shift/su_mean          0.000 
 
loop_ 
 _atom_site_label 
 _atom_site_type_symbol 
 _atom_site_fract_x 
 _atom_site_fract_y 
 _atom_site_fract_z 
 _atom_site_U_iso_or_equiv 
 _atom_site_adp_type 
 _atom_site_occupancy 
 _atom_site_symmetry_multiplicity 
 _atom_site_calc_flag 
 _atom_site_refinement_flags 
 _atom_site_disorder_assembly 
 _atom_site_disorder_group 
Ti1 Ti 0.46395(5) 0.78735(5) 0.67111(3) 0.02179(19) Uani 1 1 d . . . 
P1 P 0.54113(7) 0.98134(8) 0.67848(5) 0.0248(3) Uani 1 1 d . . . 
P2 P 0.40902(7) 0.62187(8) 0.72318(4) 0.0220(2) Uani 1 1 d . . . 
N1 N 0.4987(2) 0.8265(2) 0.75482(13) 0.0208(7) Uani 1 1 d . . . 
N2 N 0.5379(2) 0.7278(2) 0.63370(13) 0.0263(8) Uani 1 1 d . . . 
C1 C 0.5103(3) 1.0962(3) 0.63205(18) 0.0345(11) Uani 1 1 d . . . 
H1 H 0.5453 1.1605 0.6500 0.041 Uiso 1 1 calc R . . 
C2 C 0.5460(4) 1.0768(4) 0.58012(19) 0.0499(13) Uani 1 1 d . . . 
H2A H 0.5291 1.1385 0.5559 0.075 Uiso 1 1 calc R . . 
H2B H 0.5160 1.0114 0.5625 0.075 Uiso 1 1 calc R . . 
H2C H 0.6160 1.0678 0.5885 0.075 Uiso 1 1 calc R . . 
C3 C 0.4035(3) 1.1235(3) 0.62019(19) 0.0397(11) Uani 1 1 d . . . 
H3A H 0.3922 1.1871 0.5967 0.060 Uiso 1 1 calc R . . 
H3B H 0.3828 1.1388 0.6542 0.060 Uiso 1 1 calc R . . 
H3C H 0.3669 1.0624 0.6021 0.060 Uiso 1 1 calc R . . 
C4 C 0.6746(3) 0.9825(3) 0.69395(18) 0.0318(10) Uani 1 1 d . . . 
H4 H 0.6966 0.9593 0.6605 0.038 Uiso 1 1 calc R . . 
C5 C 0.7178(3) 1.0934(4) 0.7095(2) 0.0448(12) Uani 1 1 d . . . 
H5A H 0.7881 1.0883 0.7172 0.067 Uiso 1 1 calc R . . 
H5B H 0.6962 1.1194 0.7417 0.067 Uiso 1 1 calc R . . 
H5C H 0.6969 1.1438 0.6795 0.067 Uiso 1 1 calc R . . 
C6 C 0.7131(3) 0.9008(3) 0.7380(2) 0.0420(12) Uani 1 1 d . . . 
H6A H 0.7830 0.8949 0.7421 0.063 Uiso 1 1 calc R . . 
H6B H 0.6836 0.8304 0.7280 0.063 Uiso 1 1 calc R . . 
H6C H 0.6976 0.9245 0.7723 0.063 Uiso 1 1 calc R . . 
C7 C 0.5087(3) 1.0205(3) 0.74141(16) 0.0230(9) Uani 1 1 d . . . 
C8 C 0.5001(3) 1.1250(3) 0.75963(17) 0.0267(10) Uani 1 1 d . . . 
H8 H 0.5138 1.1832 0.7380 0.032 Uiso 1 1 calc R . . 
C9 C 0.4725(3) 1.1479(3) 0.80778(17) 0.0265(10) Uani 1 1 d . . . 
C10 C 0.4645(3) 1.2620(3) 0.82650(18) 0.0365(11) Uani 1 1 d . . . 
H10A H 0.5051 1.3090 0.8093 0.055 Uiso 1 1 calc R . . 
H10B H 0.4859 1.2655 0.8659 0.055 Uiso 1 1 calc R . . 
H10C H 0.3975 1.2858 0.8165 0.055 Uiso 1 1 calc R . . 
C11 C 0.4528(3) 1.0612(3) 0.83864(17) 0.0247(9) Uani 1 1 d . . . 
H11 H 0.4332 1.0744 0.8719 0.030 Uiso 1 1 calc R . . 
C12 C 0.4613(3) 0.9557(3) 0.82185(16) 0.0240(9) Uani 1 1 d . . . 
H12 H 0.4467 0.8982 0.8438 0.029 Uiso 1 1 calc R . . 
C13 C 0.4906(2) 0.9320(3) 0.77355(16) 0.0207(9) Uani 1 1 d . . . 
C14 C 0.5294(3) 0.7477(3) 0.79473(16) 0.0211(9) Uani 1 1 d . . . 
C15 C 0.5974(3) 0.7678(3) 0.84188(16) 0.0259(9) Uani 1 1 d . . . 
H15 H 0.6237 0.8381 0.8483 0.031 Uiso 1 1 calc R . . 
C16A C 0.6273(3) 0.6871(3) 0.87953(17) 0.0285(10) Uani 1 1 d . . . 
H16 H 0.6732 0.7036 0.9114 0.034 Uiso 1 1 calc R . . 
C17 C 0.5919(3) 0.5833(3) 0.87174(17) 0.0301(10) Uani 1 1 d . . . 
C18 C 0.6238(4) 0.4950(3) 0.91294(19) 0.0504(14) Uani 1 1 d . . . 
H18A H 0.6853 0.5150 0.9360 0.076 Uiso 1 1 calc R . . 
H18B H 0.6314 0.4274 0.8941 0.076 Uiso 1 1 calc R . . 
H18C H 0.5754 0.4855 0.9353 0.076 Uiso 1 1 calc R . . 
C19 C 0.5249(3) 0.5634(3) 0.82480(17) 0.0288(10) Uani 1 1 d . . . 
H19 H 0.4991 0.4928 0.8187 0.035 Uiso 1 1 calc R . . 
C20 C 0.4938(3) 0.6423(3) 0.78627(16) 0.0233(9) Uani 1 1 d . . . 
C21 C 0.2896(3) 0.6329(3) 0.74187(17) 0.0258(9) Uani 1 1 d . . . 
H21 H 0.2401 0.6296 0.7076 0.031 Uiso 1 1 calc R . . 
C22 C 0.2785(3) 0.7412(3) 0.76793(18) 0.0332(11) Uani 1 1 d . . . 
H22A H 0.2117 0.7504 0.7718 0.050 Uiso 1 1 calc R . . 
H22B H 0.2956 0.7990 0.7451 0.050 Uiso 1 1 calc R . . 
H22C H 0.3210 0.7441 0.8037 0.050 Uiso 1 1 calc R . . 
C23 C 0.2673(3) 0.5424(3) 0.77812(19) 0.0374(12) Uani 1 1 d . . . 
H23A H 0.2023 0.5521 0.7850 0.056 Uiso 1 1 calc R . . 
H23B H 0.3139 0.5438 0.8125 0.056 Uiso 1 1 calc R . . 
H23C H 0.2712 0.4729 0.7602 0.056 Uiso 1 1 calc R . . 
C24 C 0.4165(3) 0.4776(3) 0.70622(16) 0.0257(9) Uani 1 1 d . . . 
H24 H 0.4012 0.4340 0.7367 0.031 Uiso 1 1 calc R . . 
C25 C 0.3427(3) 0.4507(3) 0.65501(18) 0.0377(11) Uani 1 1 d . . . 
H25A H 0.3438 0.3730 0.6481 0.057 Uiso 1 1 calc R . . 
H25B H 0.3585 0.4900 0.6243 0.057 Uiso 1 1 calc R . . 
H25C H 0.2785 0.4717 0.6599 0.057 Uiso 1 1 calc R . . 
C26 C 0.5180(3) 0.4488(3) 0.6996(2) 0.0389(12) Uani 1 1 d . . . 
H26A H 0.5203 0.3725 0.6899 0.058 Uiso 1 1 calc R . . 
H26B H 0.5634 0.4621 0.7337 0.058 Uiso 1 1 calc R . . 
H26C H 0.5355 0.4932 0.6709 0.058 Uiso 1 1 calc R . . 
C27 C 0.3260(3) 0.8272(3) 0.62514(17) 0.0315(10) Uani 1 1 d . . . 
H27A H 0.2806 0.7989 0.6468 0.038 Uiso 1 1 calc R . . 
H27B H 0.3226 0.9067 0.6278 0.038 Uiso 1 1 calc R . . 
C28 C 0.2783(3) 0.8023(4) 0.56683(17) 0.0328(10) Uani 1 1 d . . . 
C29 C 0.1769(3) 0.8506(4) 0.5520(2) 0.0528(14) Uani 1 1 d . . . 
H29A H 0.1806 0.9290 0.5564 0.079 Uiso 1 1 calc R . . 
H29B H 0.1368 0.8204 0.5758 0.079 Uiso 1 1 calc R . . 
H29C H 0.1485 0.8331 0.5143 0.079 Uiso 1 1 calc R . . 
C30 C 0.3375(3) 0.8483(4) 0.52786(19) 0.0500(14) Uani 1 1 d . . . 
H30A H 0.4033 0.8203 0.5372 0.075 Uiso 1 1 calc R . . 
H30B H 0.3388 0.9271 0.5306 0.075 Uiso 1 1 calc R . . 
H30C H 0.3084 0.8271 0.4908 0.075 Uiso 1 1 calc R . . 
C31 C 0.2716(4) 0.6798(4) 0.5590(2) 0.0501(13) Uani 1 1 d . . . 
H31A H 0.3363 0.6486 0.5672 0.075 Uiso 1 1 calc R . . 
H31B H 0.2413 0.6635 0.5214 0.075 Uiso 1 1 calc R . . 
H31C H 0.2329 0.6490 0.5833 0.075 Uiso 1 1 calc R . . 
C32 C 0.6075(3) 0.6839(3) 0.60468(16) 0.0253(9) Uani 1 1 d . . . 
C33 C 0.6423(3) 0.7714(3) 0.57000(18) 0.0351(11) Uani 1 1 d . . . 
H33A H 0.5868 0.8006 0.5438 0.042 Uiso 1 1 calc R . . 
H33B H 0.6718 0.8312 0.5935 0.042 Uiso 1 1 calc R . . 
C34 C 0.7157(3) 0.7250(4) 0.53952(19) 0.0417(12) Uani 1 1 d . . . 
H34 H 0.7376 0.7829 0.5173 0.050 Uiso 1 1 calc R . . 
C35 C 0.6698(4) 0.6333(4) 0.5025(2) 0.0535(14) Uani 1 1 d . . . 
H35A H 0.6142 0.6610 0.4759 0.064 Uiso 1 1 calc R . . 
H35B H 0.7171 0.6034 0.4825 0.064 Uiso 1 1 calc R . . 
C36 C 0.6367(3) 0.5456(4) 0.53657(19) 0.0421(12) Uani 1 1 d . . . 
H36 H 0.6065 0.4858 0.5125 0.050 Uiso 1 1 calc R . . 
C37 C 0.7219(3) 0.5014(4) 0.5775(2) 0.0440(13) Uani 1 1 d . . . 
H37A H 0.6998 0.4445 0.5996 0.053 Uiso 1 1 calc R . . 
H37B H 0.7693 0.4692 0.5582 0.053 Uiso 1 1 calc R . . 
C38 C 0.7687(3) 0.5922(3) 0.61380(19) 0.0360(11) Uani 1 1 d . . . 
H38 H 0.8251 0.5636 0.6403 0.043 Uiso 1 1 calc R . . 
C39 C 0.6954(3) 0.6391(3) 0.64401(17) 0.0299(10) Uani 1 1 d . . . 
H39A H 0.7258 0.6976 0.6682 0.036 Uiso 1 1 calc R . . 
H39B H 0.6745 0.5824 0.6667 0.036 Uiso 1 1 calc R . . 
C40 C 0.8018(3) 0.6812(4) 0.5800(2) 0.0447(13) Uani 1 1 d . . . 
H40A H 0.8501 0.6522 0.5605 0.054 Uiso 1 1 calc R . . 
H40B H 0.8321 0.7401 0.6040 0.054 Uiso 1 1 calc R . . 
C41 C 0.5629(3) 0.5925(3) 0.56648(18) 0.0364(11) Uani 1 1 d . . . 
H41A H 0.5392 0.5350 0.5877 0.044 Uiso 1 1 calc R . . 
H41B H 0.5074 0.6208 0.5400 0.044 Uiso 1 1 calc R . . 
C1S C 0.1312(12) 0.2347(13) 0.5713(7) 0.122(6) Uiso 0.50 1 d PU A -1 
H1SA H 0.1899 0.2470 0.5573 0.184 Uiso 0.50 1 calc PR A -1 
H1SB H 0.1157 0.1576 0.5694 0.184 Uiso 0.50 1 calc PR A -1 
H1SC H 0.1412 0.2588 0.6090 0.184 Uiso 0.50 1 calc PR A -1 
C2S C 0.0583(12) 0.2903(14) 0.5414(7) 0.117(5) Uiso 0.50 1 d PU A -1 
H2SA H 0.0020 0.2807 0.5585 0.141 Uiso 0.50 1 calc PR A -1 
H2SB H 0.0423 0.2546 0.5056 0.141 Uiso 0.50 1 calc PR A -1 
O1S O 0.0661(7) 0.4010(8) 0.5318(4) 0.098(3) Uiso 0.50 1 d PU A -1 
C3S C -0.0049(13) 0.4691(10) 0.5047(8) 0.078(5) Uiso 0.50 1 d PU A -1 
H3SA H -0.0544 0.4742 0.5272 0.094 Uiso 0.50 1 calc PR A -1 
H3SB H -0.0354 0.4316 0.4710 0.094 Uiso 0.50 1 calc PR A -1 
C4S C 0.0152(13) 0.5834(12) 0.4888(7) 0.098(3) Uiso 0.50 1 d PU A -1 
H4SA H 0.0567 0.6194 0.5194 0.146 Uiso 0.50 1 calc PR A -1 
H4SB H -0.0456 0.6230 0.4788 0.146 Uiso 0.50 1 calc PR A -1 
H4SC H 0.0473 0.5818 0.4579 0.146 Uiso 0.50 1 calc PR A -1 
 
loop_ 
 _atom_site_aniso_label 
 _atom_site_aniso_U_11 
 _atom_site_aniso_U_22 
 _atom_site_aniso_U_33 
 _atom_site_aniso_U_23 
 _atom_site_aniso_U_13 
 _atom_site_aniso_U_12 
Ti1 0.0186(3) 0.0199(4) 0.0265(4) -0.0014(3) 0.0037(3) -0.0010(3) 
P1 0.0231(5) 0.0225(6) 0.0300(7) 0.0004(5) 0.0081(5) -0.0031(4) 
P2 0.0181(5) 0.0154(5) 0.0314(6) -0.0022(5) 0.0022(4) -0.0011(4) 
N1 0.0182(16) 0.0152(16) 0.029(2) -0.0001(15) 0.0040(14) -0.0022(13) 
N2 0.0215(16) 0.0230(18) 0.035(2) -0.0031(15) 0.0078(15) -0.0008(14) 
C1 0.042(3) 0.030(2) 0.034(3) 0.004(2) 0.013(2) 0.000(2) 
C2 0.054(3) 0.057(3) 0.042(3) 0.012(3) 0.019(3) -0.001(3) 
C3 0.047(3) 0.031(3) 0.040(3) 0.010(2) 0.005(2) 0.004(2) 
C4 0.023(2) 0.037(3) 0.038(3) -0.007(2) 0.013(2) -0.0100(19) 
C5 0.032(2) 0.047(3) 0.056(3) -0.001(2) 0.011(2) -0.017(2) 
C6 0.021(2) 0.038(3) 0.063(3) -0.007(2) -0.002(2) -0.002(2) 
C7 0.025(2) 0.019(2) 0.025(2) -0.0006(18) 0.0033(18) -0.0034(17) 
C8 0.028(2) 0.018(2) 0.033(3) 0.0029(19) 0.0056(19) -0.0034(17) 
C9 0.021(2) 0.023(2) 0.034(3) -0.0014(19) 0.0041(19) 0.0038(17) 
C10 0.046(3) 0.020(2) 0.044(3) 0.000(2) 0.008(2) 0.003(2) 
C11 0.022(2) 0.025(2) 0.028(2) -0.0041(19) 0.0082(18) 0.0040(17) 
C12 0.022(2) 0.021(2) 0.029(2) 0.0031(18) 0.0043(18) -0.0055(17) 
C13 0.0172(19) 0.017(2) 0.027(2) -0.0011(18) 0.0020(17) -0.0012(16) 
C14 0.0207(19) 0.019(2) 0.023(2) -0.0021(17) 0.0041(18) 0.0008(16) 
C15 0.026(2) 0.019(2) 0.033(3) -0.0009(18) 0.0037(19) 0.0024(17) 
C16A 0.027(2) 0.024(2) 0.031(3) -0.0026(19) -0.0037(19) 0.0007(17) 
C17 0.034(2) 0.025(2) 0.029(3) 0.0059(19) 0.000(2) 0.0053(19) 
C18 0.073(4) 0.029(3) 0.041(3) 0.005(2) -0.008(3) 0.005(2) 
C19 0.031(2) 0.016(2) 0.037(3) -0.0016(19) 0.003(2) -0.0013(18) 
C20 0.019(2) 0.020(2) 0.029(2) -0.0004(18) 0.0029(18) -0.0005(16) 
C21 0.0196(19) 0.020(2) 0.039(3) -0.0003(19) 0.0073(18) 0.0004(16) 
C22 0.034(2) 0.022(2) 0.047(3) -0.003(2) 0.015(2) 0.0039(18) 
C23 0.032(2) 0.028(3) 0.057(3) 0.004(2) 0.021(2) -0.0011(19) 
C24 0.031(2) 0.0147(19) 0.031(3) -0.0020(18) 0.0068(19) -0.0040(17) 
C25 0.038(2) 0.026(2) 0.046(3) -0.007(2) -0.001(2) 0.000(2) 
C26 0.030(2) 0.028(2) 0.061(3) -0.001(2) 0.013(2) 0.0088(19) 
C27 0.030(2) 0.033(2) 0.033(3) 0.005(2) 0.010(2) 0.0026(19) 
C28 0.024(2) 0.043(3) 0.031(3) 0.009(2) 0.0036(19) -0.0035(19) 
C29 0.027(2) 0.081(4) 0.049(3) 0.011(3) 0.007(2) 0.003(3) 
C30 0.037(3) 0.074(4) 0.038(3) 0.006(3) 0.005(2) -0.006(3) 
C31 0.051(3) 0.045(3) 0.048(3) -0.009(2) -0.004(3) -0.008(2) 
C32 0.021(2) 0.027(2) 0.027(2) -0.0087(18) 0.0046(18) -0.0007(17) 
C33 0.038(2) 0.036(3) 0.034(3) 0.002(2) 0.013(2) 0.004(2) 
C34 0.042(3) 0.047(3) 0.043(3) -0.002(2) 0.024(2) 0.000(2) 
C35 0.048(3) 0.078(4) 0.037(3) -0.014(3) 0.013(3) 0.011(3) 
C36 0.037(3) 0.048(3) 0.042(3) -0.021(2) 0.010(2) -0.003(2) 
C37 0.029(2) 0.039(3) 0.063(4) -0.018(2) 0.008(2) 0.002(2) 
C38 0.025(2) 0.036(3) 0.048(3) -0.004(2) 0.009(2) 0.0024(19) 
C39 0.020(2) 0.033(2) 0.036(3) -0.006(2) 0.0043(19) -0.0034(18) 
C40 0.029(2) 0.048(3) 0.062(4) -0.011(3) 0.021(2) -0.003(2) 
C41 0.025(2) 0.040(3) 0.043(3) -0.012(2) 0.004(2) -0.005(2) 
 
_geom_special_details 
; 
 All esds (except the esd in the dihedral angle between two l.s. planes) 
 are estimated using the full covariance matrix.  The cell esds are taken 
 into account individually in the estimation of esds in distances, angles 
 and torsion angles; correlations between esds in cell parameters are only 
 used when they are defined by crystal symmetry.  An approximate (isotropic) 
 treatment of cell esds is used for estimating esds involving l.s. planes. 
; 
 
loop_ 
 _geom_bond_atom_site_label_1 
 _geom_bond_atom_site_label_2 
 _geom_bond_distance 
 _geom_bond_site_symmetry_2 
 _geom_bond_publ_flag 
Ti1 N2 1.714(3) . ? 
Ti1 C27 2.125(4) . ? 
Ti1 N1 2.127(3) . ? 
Ti1 P1 2.6356(13) . ? 
Ti1 P2 2.6386(13) . ? 
P1 C7 1.807(4) . ? 
P1 C1 1.840(4) . ? 
P1 C4 1.858(4) . ? 
P2 C20 1.811(4) . ? 
P2 C24 1.848(4) . ? 
P2 C21 1.855(4) . ? 
N1 C13 1.404(5) . ? 
N1 C14 1.409(5) . ? 
N2 C32 1.450(5) . ? 
C1 C2 1.517(6) . ? 
C1 C3 1.524(6) . ? 
C1 H1 1.0000 . ? 
C2 H2A 0.9800 . ? 
C2 H2B 0.9800 . ? 
C2 H2C 0.9800 . ? 
C3 H3A 0.9800 . ? 
C3 H3B 0.9800 . ? 
C3 H3C 0.9800 . ? 
C4 C6 1.523(6) . ? 
C4 C5 1.526(6) . ? 
C4 H4 1.0000 . ? 
C5 H5A 0.9800 . ? 
C5 H5B 0.9800 . ? 
C5 H5C 0.9800 . ? 
C6 H6A 0.9800 . ? 
C6 H6B 0.9800 . ? 
C6 H6C 0.9800 . ? 
C7 C8 1.388(5) . ? 
C7 C13 1.419(5) . ? 
C8 C9 1.379(5) . ? 
C8 H8 0.9500 . ? 
C9 C11 1.389(5) . ? 
C9 C10 1.504(5) . ? 
C10 H10A 0.9800 . ? 
C10 H10B 0.9800 . ? 
C10 H10C 0.9800 . ? 
C11 C12 1.388(5) . ? 
C11 H11 0.9500 . ? 
C12 C13 1.396(5) . ? 
C12 H12 0.9500 . ? 
C14 C15 1.396(5) . ? 
C14 C20 1.403(5) . ? 
C15 C16A 1.387(5) . ? 
C15 H15 0.9500 . ? 
C16A C17 1.383(5) . ? 
C16A H16 0.9500 . ? 
C17 C19 1.384(5) . ? 
C17 C18 1.515(6) . ? 
C18 H18A 0.9800 . ? 
C18 H18B 0.9800 . ? 
C18 H18C 0.9800 . ? 
C19 C20 1.387(5) . ? 
C19 H19 0.9500 . ? 
C21 C22 1.518(5) . ? 
C21 C23 1.522(5) . ? 
C21 H21 1.0000 . ? 
C22 H22A 0.9800 . ? 
C22 H22B 0.9800 . ? 
C22 H22C 0.9800 . ? 
C23 H23A 0.9800 . ? 
C23 H23B 0.9800 . ? 
C23 H23C 0.9800 . ? 
C24 C26 1.527(5) . ? 
C24 C25 1.529(5) . ? 
C24 H24 1.0000 . ? 
C25 H25A 0.9800 . ? 
C25 H25B 0.9800 . ? 
C25 H25C 0.9800 . ? 
C26 H26A 0.9800 . ? 
C26 H26B 0.9800 . ? 
C26 H26C 0.9800 . ? 
C27 C28 1.523(6) . ? 
C27 H27A 0.9900 . ? 
C27 H27B 0.9900 . ? 
C28 C30 1.528(6) . ? 
C28 C31 1.533(6) . ? 
C28 C29 1.535(6) . ? 
C29 H29A 0.9800 . ? 
C29 H29B 0.9800 . ? 
C29 H29C 0.9800 . ? 
C30 H30A 0.9800 . ? 
C30 H30B 0.9800 . ? 
C30 H30C 0.9800 . ? 
C31 H31A 0.9800 . ? 
C31 H31B 0.9800 . ? 
C31 H31C 0.9800 . ? 
C32 C39 1.534(5) . ? 
C32 C33 1.537(6) . ? 
C32 C41 1.539(5) . ? 
C33 C34 1.527(6) . ? 
C33 H33A 0.9900 . ? 
C33 H33B 0.9900 . ? 
C34 C40 1.528(6) . ? 
C34 C35 1.532(6) . ? 
C34 H34 1.0000 . ? 
C35 C36 1.518(7) . ? 
C35 H35A 0.9900 . ? 
C35 H35B 0.9900 . ? 
C36 C37 1.525(6) . ? 
C36 C41 1.526(6) . ? 
C36 H36 1.0000 . ? 
C37 C38 1.518(6) . ? 
C37 H37A 0.9900 . ? 
C37 H37B 0.9900 . ? 
C38 C39 1.525(6) . ? 
C38 C40 1.525(6) . ? 
C38 H38 1.0000 . ? 
C39 H39A 0.9900 . ? 
C39 H39B 0.9900 . ? 
C40 H40A 0.9900 . ? 
C40 H40B 0.9900 . ? 
C41 H41A 0.9900 . ? 
C41 H41B 0.9900 . ? 
C1S C2S 1.344(18) . ? 
C1S H1SA 0.9800 . ? 
C1S H1SB 0.9800 . ? 
C1S H1SC 0.9800 . ? 
C2S O1S 1.403(17) . ? 
C2S H2SA 0.9900 . ? 
C2S H2SB 0.9900 . ? 
O1S C3S 1.386(18) . ? 
C3S C4S 1.52(2) . ? 
C3S H3SA 0.9900 . ? 
C3S H3SB 0.9900 . ? 
C4S H4SA 0.9800 . ? 
C4S H4SB 0.9800 . ? 
C4S H4SC 0.9800 . ? 
 
loop_ 
 _geom_angle_atom_site_label_1 
 _geom_angle_atom_site_label_2 
 _geom_angle_atom_site_label_3 
 _geom_angle 
 _geom_angle_site_symmetry_1 
 _geom_angle_site_symmetry_3 
 _geom_angle_publ_flag 
N2 Ti1 C27 113.53(16) . . ? 
N2 Ti1 N1 126.88(13) . . ? 
C27 Ti1 N1 119.56(14) . . ? 
N2 Ti1 P1 98.04(11) . . ? 
C27 Ti1 P1 98.67(12) . . ? 
N1 Ti1 P1 73.21(8) . . ? 
N2 Ti1 P2 102.39(11) . . ? 
C27 Ti1 P2 96.92(12) . . ? 
N1 Ti1 P2 73.49(8) . . ? 
P1 Ti1 P2 146.70(5) . . ? 
C7 P1 C1 106.34(19) . . ? 
C7 P1 C4 104.06(18) . . ? 
C1 P1 C4 103.3(2) . . ? 
C7 P1 Ti1 97.56(12) . . ? 
C1 P1 Ti1 128.28(15) . . ? 
C4 P1 Ti1 114.48(14) . . ? 
C20 P2 C24 106.24(17) . . ? 
C20 P2 C21 104.30(19) . . ? 
C24 P2 C21 103.22(17) . . ? 
C20 P2 Ti1 96.78(13) . . ? 
C24 P2 Ti1 126.97(14) . . ? 
C21 P2 Ti1 116.51(13) . . ? 
C13 N1 C14 116.2(3) . . ? 
C13 N1 Ti1 121.9(2) . . ? 
C14 N1 Ti1 121.9(2) . . ? 
C32 N2 Ti1 174.7(3) . . ? 
C2 C1 C3 111.0(4) . . ? 
C2 C1 P1 110.4(3) . . ? 
C3 C1 P1 113.4(3) . . ? 
C2 C1 H1 107.2 . . ? 
C3 C1 H1 107.2 . . ? 
P1 C1 H1 107.2 . . ? 
C1 C2 H2A 109.5 . . ? 
C1 C2 H2B 109.5 . . ? 
H2A C2 H2B 109.5 . . ? 
C1 C2 H2C 109.5 . . ? 
H2A C2 H2C 109.5 . . ? 
H2B C2 H2C 109.5 . . ? 
C1 C3 H3A 109.5 . . ? 
C1 C3 H3B 109.5 . . ? 
H3A C3 H3B 109.5 . . ? 
C1 C3 H3C 109.5 . . ? 
H3A C3 H3C 109.5 . . ? 
H3B C3 H3C 109.5 . . ? 
C6 C4 C5 110.3(4) . . ? 
C6 C4 P1 110.5(3) . . ? 
C5 C4 P1 113.7(3) . . ? 
C6 C4 H4 107.4 . . ? 
C5 C4 H4 107.4 . . ? 
P1 C4 H4 107.4 . . ? 
C4 C5 H5A 109.5 . . ? 
C4 C5 H5B 109.5 . . ? 
H5A C5 H5B 109.5 . . ? 
C4 C5 H5C 109.5 . . ? 
H5A C5 H5C 109.5 . . ? 
H5B C5 H5C 109.5 . . ? 
C4 C6 H6A 109.5 . . ? 
C4 C6 H6B 109.5 . . ? 
H6A C6 H6B 109.5 . . ? 
C4 C6 H6C 109.5 . . ? 
H6A C6 H6C 109.5 . . ? 
H6B C6 H6C 109.5 . . ? 
C8 C7 C13 119.6(4) . . ? 
C8 C7 P1 126.7(3) . . ? 
C13 C7 P1 113.7(3) . . ? 
C9 C8 C7 122.9(4) . . ? 
C9 C8 H8 118.5 . . ? 
C7 C8 H8 118.5 . . ? 
C8 C9 C11 117.3(4) . . ? 
C8 C9 C10 121.6(4) . . ? 
C11 C9 C10 121.1(4) . . ? 
C9 C10 H10A 109.5 . . ? 
C9 C10 H10B 109.5 . . ? 
H10A C10 H10B 109.5 . . ? 
C9 C10 H10C 109.5 . . ? 
H10A C10 H10C 109.5 . . ? 
H10B C10 H10C 109.5 . . ? 
C12 C11 C9 121.3(4) . . ? 
C12 C11 H11 119.4 . . ? 
C9 C11 H11 119.4 . . ? 
C11 C12 C13 121.6(4) . . ? 
C11 C12 H12 119.2 . . ? 
C13 C12 H12 119.2 . . ? 
C12 C13 N1 123.3(3) . . ? 
C12 C13 C7 117.2(3) . . ? 
N1 C13 C7 119.5(3) . . ? 
C15 C14 C20 117.5(3) . . ? 
C15 C14 N1 123.2(3) . . ? 
C20 C14 N1 119.2(3) . . ? 
C16A C15 C14 121.3(4) . . ? 
C16A C15 H15 119.4 . . ? 
C14 C15 H15 119.4 . . ? 
C17 C16A C15 121.5(4) . . ? 
C17 C16A H16 119.3 . . ? 
C15 C16A H16 119.3 . . ? 
C16A C17 C19 117.1(4) . . ? 
C16A C17 C18 121.7(4) . . ? 
C19 C17 C18 121.2(4) . . ? 
C17 C18 H18A 109.5 . . ? 
C17 C18 H18B 109.5 . . ? 
H18A C18 H18B 109.5 . . ? 
C17 C18 H18C 109.5 . . ? 
H18A C18 H18C 109.5 . . ? 
H18B C18 H18C 109.5 . . ? 
C17 C19 C20 122.8(4) . . ? 
C17 C19 H19 118.6 . . ? 
C20 C19 H19 118.6 . . ? 
C19 C20 C14 119.8(4) . . ? 
C19 C20 P2 125.4(3) . . ? 
C14 C20 P2 114.8(3) . . ? 
C22 C21 C23 109.9(3) . . ? 
C22 C21 P2 110.8(3) . . ? 
C23 C21 P2 114.2(3) . . ? 
C22 C21 H21 107.2 . . ? 
C23 C21 H21 107.2 . . ? 
P2 C21 H21 107.2 . . ? 
C21 C22 H22A 109.5 . . ? 
C21 C22 H22B 109.5 . . ? 
H22A C22 H22B 109.5 . . ? 
C21 C22 H22C 109.5 . . ? 
H22A C22 H22C 109.5 . . ? 
H22B C22 H22C 109.5 . . ? 
C21 C23 H23A 109.5 . . ? 
C21 C23 H23B 109.5 . . ? 
H23A C23 H23B 109.5 . . ? 
C21 C23 H23C 109.5 . . ? 
H23A C23 H23C 109.5 . . ? 
H23B C23 H23C 109.5 . . ? 
C26 C24 C25 111.0(4) . . ? 
C26 C24 P2 110.6(3) . . ? 
C25 C24 P2 110.2(3) . . ? 
C26 C24 H24 108.3 . . ? 
C25 C24 H24 108.3 . . ? 
P2 C24 H24 108.3 . . ? 
C24 C25 H25A 109.5 . . ? 
C24 C25 H25B 109.5 . . ? 
H25A C25 H25B 109.5 . . ? 
C24 C25 H25C 109.5 . . ? 
H25A C25 H25C 109.5 . . ? 
H25B C25 H25C 109.5 . . ? 
C24 C26 H26A 109.5 . . ? 
C24 C26 H26B 109.5 . . ? 
H26A C26 H26B 109.5 . . ? 
C24 C26 H26C 109.5 . . ? 
H26A C26 H26C 109.5 . . ? 
H26B C26 H26C 109.5 . . ? 
C28 C27 Ti1 131.5(3) . . ? 
C28 C27 H27A 104.4 . . ? 
Ti1 C27 H27A 104.4 . . ? 
C28 C27 H27B 104.4 . . ? 
Ti1 C27 H27B 104.4 . . ? 
H27A C27 H27B 105.6 . . ? 
C27 C28 C30 110.5(3) . . ? 
C27 C28 C31 109.3(4) . . ? 
C30 C28 C31 108.3(4) . . ? 
C27 C28 C29 111.7(4) . . ? 
C30 C28 C29 107.9(4) . . ? 
C31 C28 C29 109.0(4) . . ? 
C28 C29 H29A 109.5 . . ? 
C28 C29 H29B 109.5 . . ? 
H29A C29 H29B 109.5 . . ? 
C28 C29 H29C 109.5 . . ? 
H29A C29 H29C 109.5 . . ? 
H29B C29 H29C 109.5 . . ? 
C28 C30 H30A 109.5 . . ? 
C28 C30 H30B 109.5 . . ? 
H30A C30 H30B 109.5 . . ? 
C28 C30 H30C 109.5 . . ? 
H30A C30 H30C 109.5 . . ? 
H30B C30 H30C 109.5 . . ? 
C28 C31 H31A 109.5 . . ? 
C28 C31 H31B 109.5 . . ? 
H31A C31 H31B 109.5 . . ? 
C28 C31 H31C 109.5 . . ? 
H31A C31 H31C 109.5 . . ? 
H31B C31 H31C 109.5 . . ? 
N2 C32 C39 111.0(3) . . ? 
N2 C32 C33 110.6(3) . . ? 
C39 C32 C33 108.1(3) . . ? 
N2 C32 C41 110.9(3) . . ? 
C39 C32 C41 108.5(3) . . ? 
C33 C32 C41 107.6(3) . . ? 
C34 C33 C32 110.5(3) . . ? 
C34 C33 H33A 109.5 . . ? 
C32 C33 H33A 109.5 . . ? 
C34 C33 H33B 109.5 . . ? 
C32 C33 H33B 109.5 . . ? 
H33A C33 H33B 108.1 . . ? 
C33 C34 C40 109.4(4) . . ? 
C33 C34 C35 109.7(4) . . ? 
C40 C34 C35 109.2(4) . . ? 
C33 C34 H34 109.5 . . ? 
C40 C34 H34 109.5 . . ? 
C35 C34 H34 109.5 . . ? 
C36 C35 C34 109.2(4) . . ? 
C36 C35 H35A 109.8 . . ? 
C34 C35 H35A 109.8 . . ? 
C36 C35 H35B 109.8 . . ? 
C34 C35 H35B 109.8 . . ? 
H35A C35 H35B 108.3 . . ? 
C35 C36 C37 110.3(4) . . ? 
C35 C36 C41 109.1(4) . . ? 
C37 C36 C41 109.5(4) . . ? 
C35 C36 H36 109.3 . . ? 
C37 C36 H36 109.3 . . ? 
C41 C36 H36 109.3 . . ? 
C38 C37 C36 109.5(4) . . ? 
C38 C37 H37A 109.8 . . ? 
C36 C37 H37A 109.8 . . ? 
C38 C37 H37B 109.8 . . ? 
C36 C37 H37B 109.8 . . ? 
H37A C37 H37B 108.2 . . ? 
C37 C38 C39 109.0(3) . . ? 
C37 C38 C40 110.2(4) . . ? 
C39 C38 C40 108.7(3) . . ? 
C37 C38 H38 109.6 . . ? 
C39 C38 H38 109.6 . . ? 
C40 C38 H38 109.6 . . ? 
C38 C39 C32 111.3(3) . . ? 
C38 C39 H39A 109.4 . . ? 
C32 C39 H39A 109.4 . . ? 
C38 C39 H39B 109.4 . . ? 
C32 C39 H39B 109.4 . . ? 
H39A C39 H39B 108.0 . . ? 
C38 C40 C34 109.7(3) . . ? 
C38 C40 H40A 109.7 . . ? 
C34 C40 H40A 109.7 . . ? 
C38 C40 H40B 109.7 . . ? 
C34 C40 H40B 109.7 . . ? 
H40A C40 H40B 108.2 . . ? 
C36 C41 C32 110.7(3) . . ? 
C36 C41 H41A 109.5 . . ? 
C32 C41 H41A 109.5 . . ? 
C36 C41 H41B 109.5 . . ? 
C32 C41 H41B 109.5 . . ? 
H41A C41 H41B 108.1 . . ? 
C1S C2S O1S 121.4(15) . . ? 
C1S C2S H2SA 107.0 . . ? 
O1S C2S H2SA 107.0 . . ? 
C1S C2S H2SB 107.0 . . ? 
O1S C2S H2SB 107.0 . . ? 
H2SA C2S H2SB 106.7 . . ? 
C3S O1S C2S 127.4(12) . . ? 
O1S C3S C4S 122.9(11) . . ? 
O1S C3S H3SA 106.6 . . ? 
C4S C3S H3SA 106.6 . . ? 
O1S C3S H3SB 106.6 . . ? 
C4S C3S H3SB 106.6 . . ? 
H3SA C3S H3SB 106.6 . . ? 
 
loop_ 
 _geom_torsion_atom_site_label_1 
 _geom_torsion_atom_site_label_2 
 _geom_torsion_atom_site_label_3 
 _geom_torsion_atom_site_label_4 
 _geom_torsion 
 _geom_torsion_site_symmetry_1 
 _geom_torsion_site_symmetry_2 
 _geom_torsion_site_symmetry_3 
 _geom_torsion_site_symmetry_4 
 _geom_torsion_publ_flag 
N2 Ti1 P1 C7 -152.96(16) . . . . ? 
C27 Ti1 P1 C7 91.61(17) . . . . ? 
N1 Ti1 P1 C7 -26.77(15) . . . . ? 
P2 Ti1 P1 C7 -25.40(15) . . . . ? 
N2 Ti1 P1 C1 89.2(2) . . . . ? 
C27 Ti1 P1 C1 -26.2(2) . . . . ? 
N1 Ti1 P1 C1 -144.6(2) . . . . ? 
P2 Ti1 P1 C1 -143.19(18) . . . . ? 
N2 Ti1 P1 C4 -43.70(19) . . . . ? 
C27 Ti1 P1 C4 -159.13(19) . . . . ? 
N1 Ti1 P1 C4 82.49(18) . . . . ? 
P2 Ti1 P1 C4 83.86(17) . . . . ? 
N2 Ti1 P2 C20 98.66(16) . . . . ? 
C27 Ti1 P2 C20 -145.34(17) . . . . ? 
N1 Ti1 P2 C20 -26.49(15) . . . . ? 
P1 Ti1 P2 C20 -27.86(15) . . . . ? 
N2 Ti1 P2 C24 -17.57(19) . . . . ? 
C27 Ti1 P2 C24 98.4(2) . . . . ? 
N1 Ti1 P2 C24 -142.72(18) . . . . ? 
P1 Ti1 P2 C24 -144.09(16) . . . . ? 
N2 Ti1 P2 C21 -151.63(18) . . . . ? 
C27 Ti1 P2 C21 -35.63(19) . . . . ? 
N1 Ti1 P2 C21 83.22(17) . . . . ? 
P1 Ti1 P2 C21 81.85(17) . . . . ? 
N2 Ti1 N1 C13 123.0(3) . . . . ? 
C27 Ti1 N1 C13 -55.1(3) . . . . ? 
P1 Ti1 N1 C13 35.5(2) . . . . ? 
P2 Ti1 N1 C13 -143.7(3) . . . . ? 
N2 Ti1 N1 C14 -58.1(3) . . . . ? 
C27 Ti1 N1 C14 123.8(3) . . . . ? 
P1 Ti1 N1 C14 -145.6(3) . . . . ? 
P2 Ti1 N1 C14 35.2(2) . . . . ? 
C27 Ti1 N2 C32 137(3) . . . . ? 
N1 Ti1 N2 C32 -41(3) . . . . ? 
P1 Ti1 N2 C32 34(3) . . . . ? 
P2 Ti1 N2 C32 -120(3) . . . . ? 
C7 P1 C1 C2 173.1(3) . . . . ? 
C4 P1 C1 C2 63.8(4) . . . . ? 
Ti1 P1 C1 C2 -73.0(3) . . . . ? 
C7 P1 C1 C3 -61.6(4) . . . . ? 
C4 P1 C1 C3 -170.9(3) . . . . ? 
Ti1 P1 C1 C3 52.3(4) . . . . ? 
C7 P1 C4 C6 61.7(3) . . . . ? 
C1 P1 C4 C6 172.7(3) . . . . ? 
Ti1 P1 C4 C6 -43.5(3) . . . . ? 
C7 P1 C4 C5 -62.8(4) . . . . ? 
C1 P1 C4 C5 48.1(4) . . . . ? 
Ti1 P1 C4 C5 -168.1(3) . . . . ? 
C1 P1 C7 C8 -23.7(4) . . . . ? 
C4 P1 C7 C8 85.0(4) . . . . ? 
Ti1 P1 C7 C8 -157.3(3) . . . . ? 
C1 P1 C7 C13 156.0(3) . . . . ? 
C4 P1 C7 C13 -95.3(3) . . . . ? 
Ti1 P1 C7 C13 22.3(3) . . . . ? 
C13 C7 C8 C9 -1.3(6) . . . . ? 
P1 C7 C8 C9 178.3(3) . . . . ? 
C7 C8 C9 C11 0.0(6) . . . . ? 
C7 C8 C9 C10 179.6(4) . . . . ? 
C8 C9 C11 C12 0.5(5) . . . . ? 
C10 C9 C11 C12 -179.2(3) . . . . ? 
C9 C11 C12 C13 0.5(6) . . . . ? 
C11 C12 C13 N1 -179.0(3) . . . . ? 
C11 C12 C13 C7 -1.9(5) . . . . ? 
C14 N1 C13 C12 -34.8(5) . . . . ? 
Ti1 N1 C13 C12 144.1(3) . . . . ? 
C14 N1 C13 C7 148.1(3) . . . . ? 
Ti1 N1 C13 C7 -33.0(4) . . . . ? 
C8 C7 C13 C12 2.2(5) . . . . ? 
P1 C7 C13 C12 -177.5(3) . . . . ? 
C8 C7 C13 N1 179.5(3) . . . . ? 
P1 C7 C13 N1 -0.2(4) . . . . ? 
C13 N1 C14 C15 -36.3(5) . . . . ? 
Ti1 N1 C14 C15 144.8(3) . . . . ? 
C13 N1 C14 C20 146.6(3) . . . . ? 
Ti1 N1 C14 C20 -32.3(5) . . . . ? 
C20 C14 C15 C16A -1.3(6) . . . . ? 
N1 C14 C15 C16A -178.5(4) . . . . ? 
C14 C15 C16A C17 0.7(6) . . . . ? 
C15 C16A C17 C19 -0.2(6) . . . . ? 
C15 C16A C17 C18 -179.6(4) . . . . ? 
C16A C17 C19 C20 0.5(6) . . . . ? 
C18 C17 C19 C20 179.9(4) . . . . ? 
C17 C19 C20 C14 -1.2(6) . . . . ? 
C17 C19 C20 P2 178.3(3) . . . . ? 
C15 C14 C20 C19 1.5(6) . . . . ? 
N1 C14 C20 C19 178.8(4) . . . . ? 
C15 C14 C20 P2 -178.0(3) . . . . ? 
N1 C14 C20 P2 -0.7(5) . . . . ? 
C24 P2 C20 C19 -25.3(4) . . . . ? 
C21 P2 C20 C19 83.4(4) . . . . ? 
Ti1 P2 C20 C19 -157.0(3) . . . . ? 
C24 P2 C20 C14 154.2(3) . . . . ? 
C21 P2 C20 C14 -97.1(3) . . . . ? 
Ti1 P2 C20 C14 22.5(3) . . . . ? 
C20 P2 C21 C22 57.7(3) . . . . ? 
C24 P2 C21 C22 168.6(3) . . . . ? 
Ti1 P2 C21 C22 -47.5(3) . . . . ? 
C20 P2 C21 C23 -67.0(3) . . . . ? 
C24 P2 C21 C23 43.8(3) . . . . ? 
Ti1 P2 C21 C23 -172.3(3) . . . . ? 
C20 P2 C24 C26 -60.3(3) . . . . ? 
C21 P2 C24 C26 -169.7(3) . . . . ? 
Ti1 P2 C24 C26 51.6(3) . . . . ? 
C20 P2 C24 C25 176.6(3) . . . . ? 
C21 P2 C24 C25 67.1(3) . . . . ? 
Ti1 P2 C24 C25 -71.5(3) . . . . ? 
N2 Ti1 C27 C28 7.1(4) . . . . ? 
N1 Ti1 C27 C28 -174.6(3) . . . . ? 
P1 Ti1 C27 C28 109.9(4) . . . . ? 
P2 Ti1 C27 C28 -99.6(4) . . . . ? 
Ti1 C27 C28 C30 -59.1(5) . . . . ? 
Ti1 C27 C28 C31 60.0(5) . . . . ? 
Ti1 C27 C28 C29 -179.3(3) . . . . ? 
Ti1 N2 C32 C39 56(3) . . . . ? 
Ti1 N2 C32 C33 -64(3) . . . . ? 
Ti1 N2 C32 C41 177(100) . . . . ? 
N2 C32 C33 C34 179.9(3) . . . . ? 
C39 C32 C33 C34 58.2(4) . . . . ? 
C41 C32 C33 C34 -58.8(4) . . . . ? 
C32 C33 C34 C40 -59.9(5) . . . . ? 
C32 C33 C34 C35 59.9(5) . . . . ? 
C33 C34 C35 C36 -59.9(5) . . . . ? 
C40 C34 C35 C36 60.0(5) . . . . ? 
C34 C35 C36 C37 -60.0(5) . . . . ? 
C34 C35 C36 C41 60.3(5) . . . . ? 
C35 C36 C37 C38 59.2(5) . . . . ? 
C41 C36 C37 C38 -60.9(5) . . . . ? 
C36 C37 C38 C39 60.7(5) . . . . ? 
C36 C37 C38 C40 -58.5(5) . . . . ? 
C37 C38 C39 C32 -59.9(5) . . . . ? 
C40 C38 C39 C32 60.3(4) . . . . ? 
N2 C32 C39 C38 179.7(3) . . . . ? 
C33 C32 C39 C38 -58.9(4) . . . . ? 
C41 C32 C39 C38 57.6(4) . . . . ? 
C37 C38 C40 C34 59.3(5) . . . . ? 
C39 C38 C40 C34 -60.1(5) . . . . ? 
C33 C34 C40 C38 60.4(5) . . . . ? 
C35 C34 C40 C38 -59.7(5) . . . . ? 
C35 C36 C41 C32 -61.3(5) . . . . ? 
C37 C36 C41 C32 59.5(5) . . . . ? 
N2 C32 C41 C36 -179.3(4) . . . . ? 
C39 C32 C41 C36 -57.1(5) . . . . ? 
C33 C32 C41 C36 59.7(4) . . . . ? 
C1S C2S O1S C3S -175.7(17) . . . . ? 
C2S O1S C3S C4S -170.0(13) . . . . ? 
 
_diffrn_measured_fraction_theta_max    0.995 
_diffrn_reflns_theta_full              25.71 
_diffrn_measured_fraction_theta_full   0.995 
_refine_diff_density_max    0.449 
_refine_diff_density_min   -0.375 
_refine_diff_density_rms    0.071 
